# Supplementary material for: Capability and Mechanism of Ammonium Adsorption from Aqueous Solution onto Various Biochars (wood, rice husk, bamboo)
Source: Research Square preprint supplement (doi:10.21203/rs.3.rs-8235895/v1), 2026-02-17
Supplement: Supplementary file 1 [file 805f65fc5c9255cda4943e5c.docx]

**Supporting Information for:**

**Capability and Mechanism of Ammonium Adsorption from Aqueous Solution onto Various Biochars (wood, rice husk, bamboo)**

Nguyen Van Hiena,, Eugenia Valsami-Jonesb, Nguyen Thi Thanh Tama, Bruno Glaserc, Iseult Lynchb

a Department of Land Use, Soils and Fertilizers Research Institute, Hanoi, Vietnam

b School of Geography, Earth and Environmental Sciences, University of Birmingham, Edgbaston, B15 2TT, UK

c Soil Biogeochemistry, [Martin Luther University Halle-Wittenberg, von-Seckendorff-Platz 3, 06120 Halle, Germany](https://www.researchgate.net/institution/Martin-Luther-University-Halle-Wittenberg?_tp=eyJjb250ZXh0Ijp7ImZpcnN0UGFnZSI6InByb2ZpbGUiLCJwYWdlIjoicHJvZmlsZSJ9fQ)

Corresponding author: [i.lynch@bham.ac.uk](mailto:i.lynch@bham.ac.uk)

Table 1. Physico-chemical characteristics of the three biochar

| Parameters | Wood BC | Rice husk BC | Bamboo BC |
| --- | --- | --- | --- |
| pH | 10.11 ±0.04 a | 9.51 ±0.02 a | 9.94 ±0.02 a |
| CEC, Cmol/kg | 13.53 ±0.65 a | 26.70 ±1.57 c | 20.77 ±1.21 b |
| Moisture, % | 5.45 ±0.03 a | 5.37 ±0.05 a | 6.11 ±0.11 a |
| Volatile,% | 46.68 ±1.68 a | 45.61 ±0.54 a | 48.72 ±3.22 a |
| Ash,% | 1.93 ±0.03 a | 41.24 ±0.49 c | 8.08 ±0.20 b |
| Fixed carbon,% | 45.94 ±1.68 c | 7.82 ±0.10 a | 37.09 ±3.32 b |
| SA, m2/g | 479.34 ±0.88c | 434 .53 ±2.79b | 3.29 ±0.02a |
| C, % | 82.10 ±0.21 c | 47.82 ±0.18 a | 80.27 ±0.08 b |
| H, % | 2.33 ±0.01 a | 2.07 ±0.04 a | 2.07 ±0.04 a |
| N, % | 0.71 ±0.05 a | 0.62 ±0.06 a | 0.72 ±0.02 a |
| O, % | 12.93 ±0.16 a | 8.25 ±0.28 b | 8.86 ±0.02 b |
| P,% | 0.22 ±0.21 a | 0.22 ±0.20 a | 0.88 ±0.13 a |
| K,% | 1.58 ±0.62 a | 1.89 ±0.63 a | 0.47 ±0.13 a |
| Ca,% | 0.65 ±0.06 a | 2.37 ±0.18 b | 0.57 ±0.01 a |
| Mg,% | 0.21 ±0.05 a | 0.26 ±0.10 a | 0.14 ±0.03 a |

Note: Data are mean values or ± standard deviation. The same letters indicate no significant difference (p<0.05) while different letters indicate statistically significant differences between the BCs.


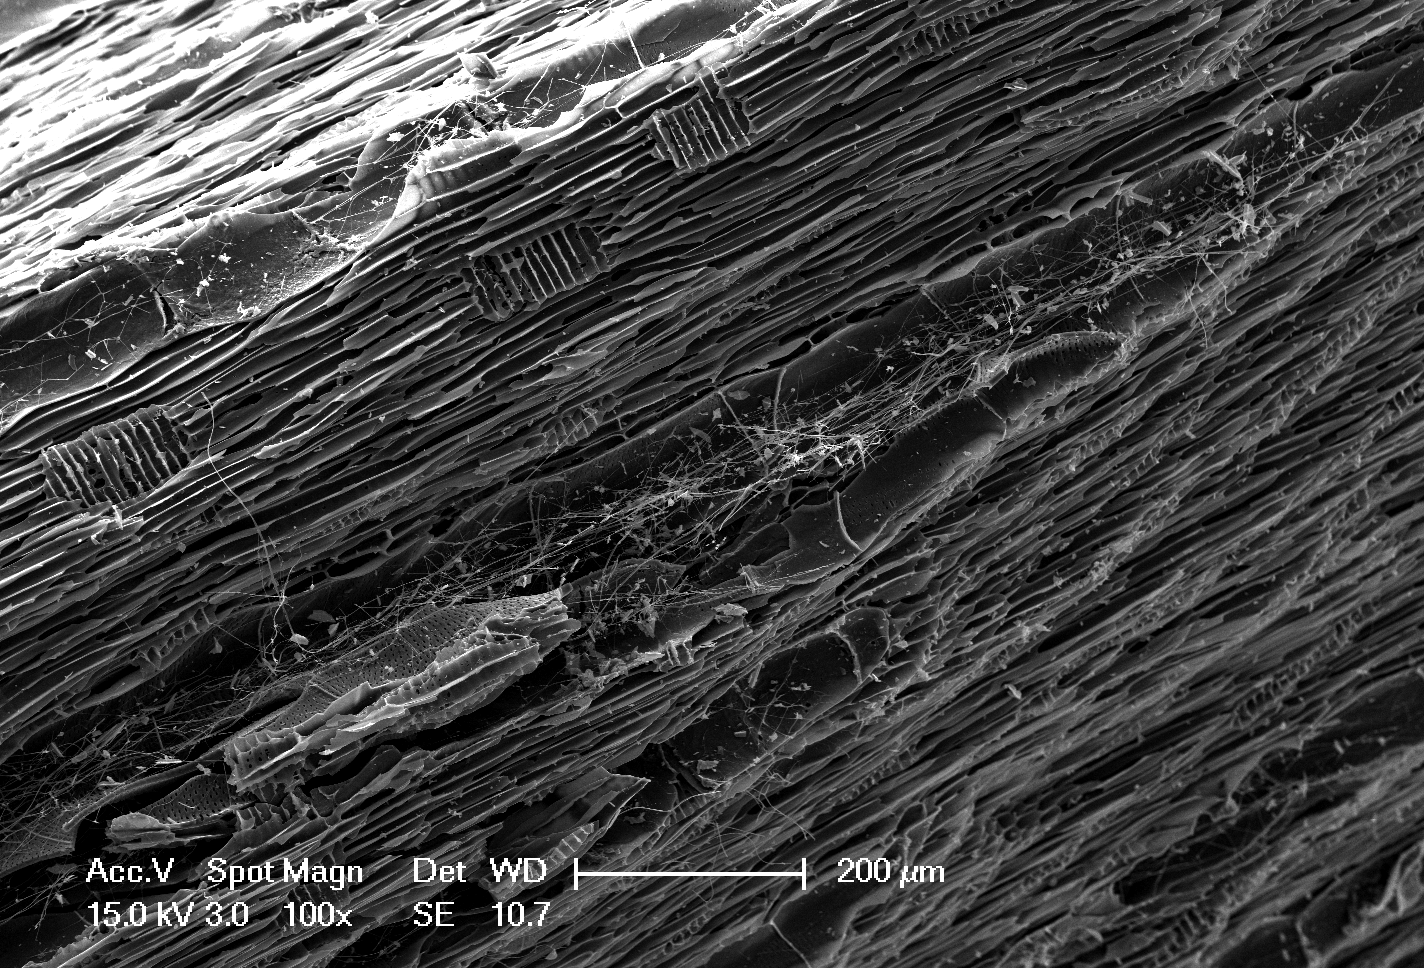


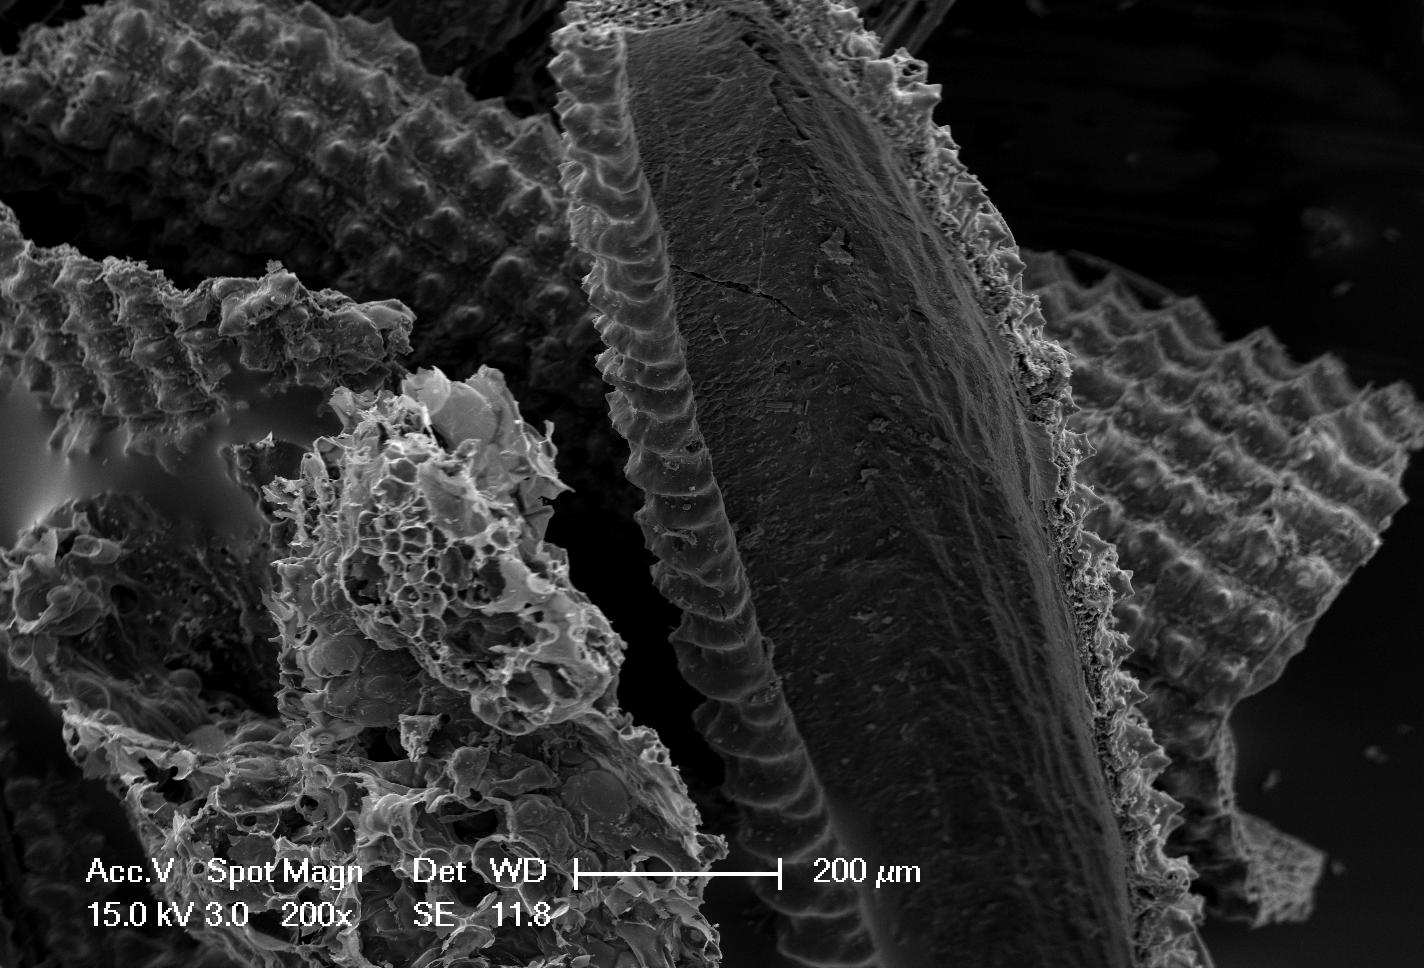


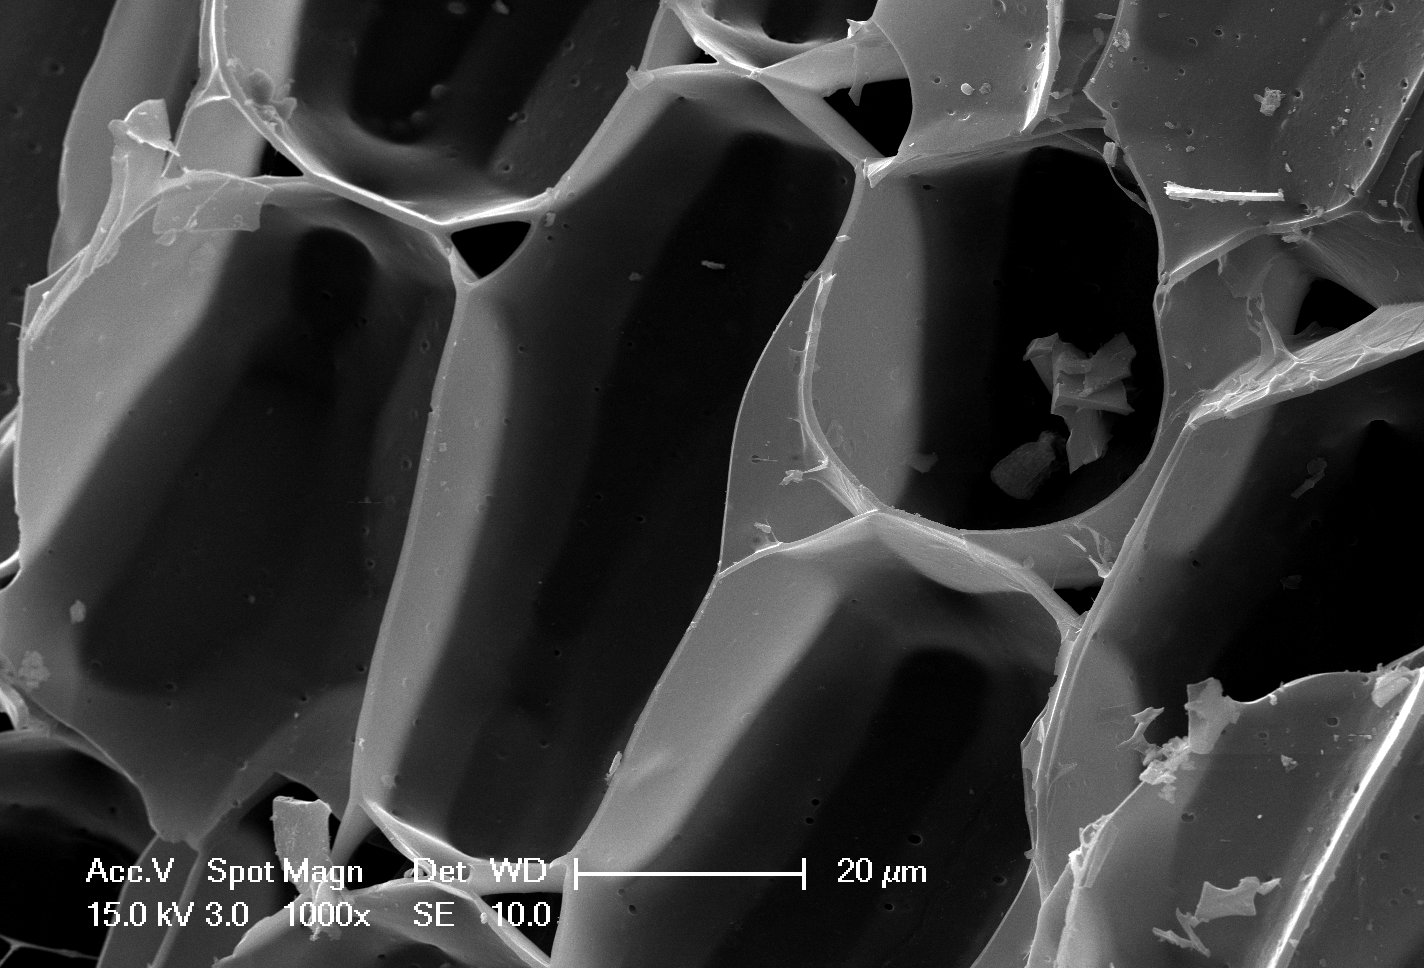


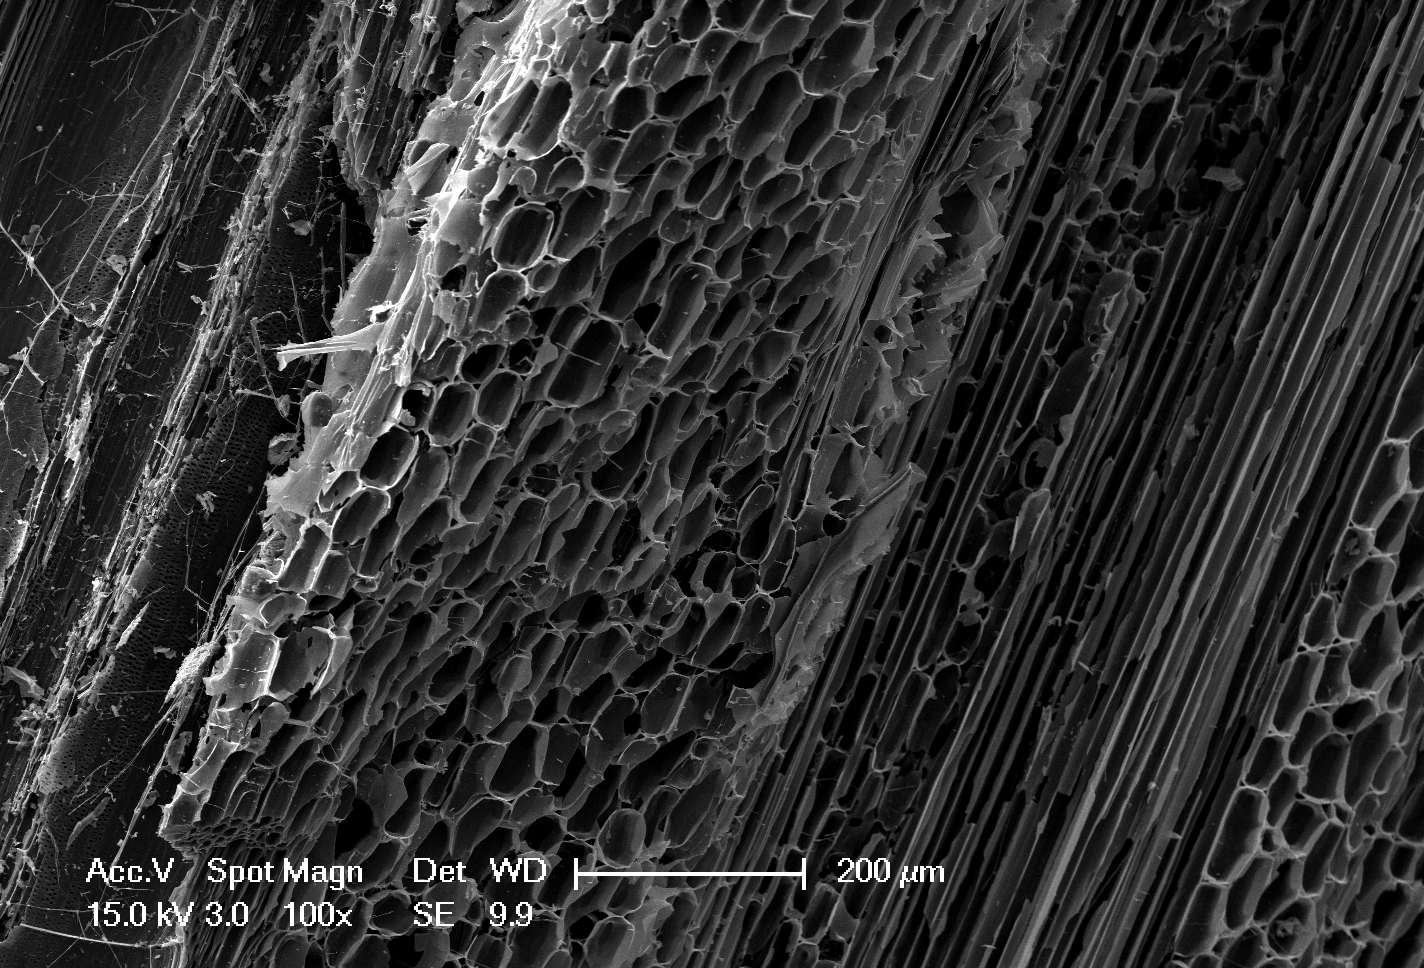


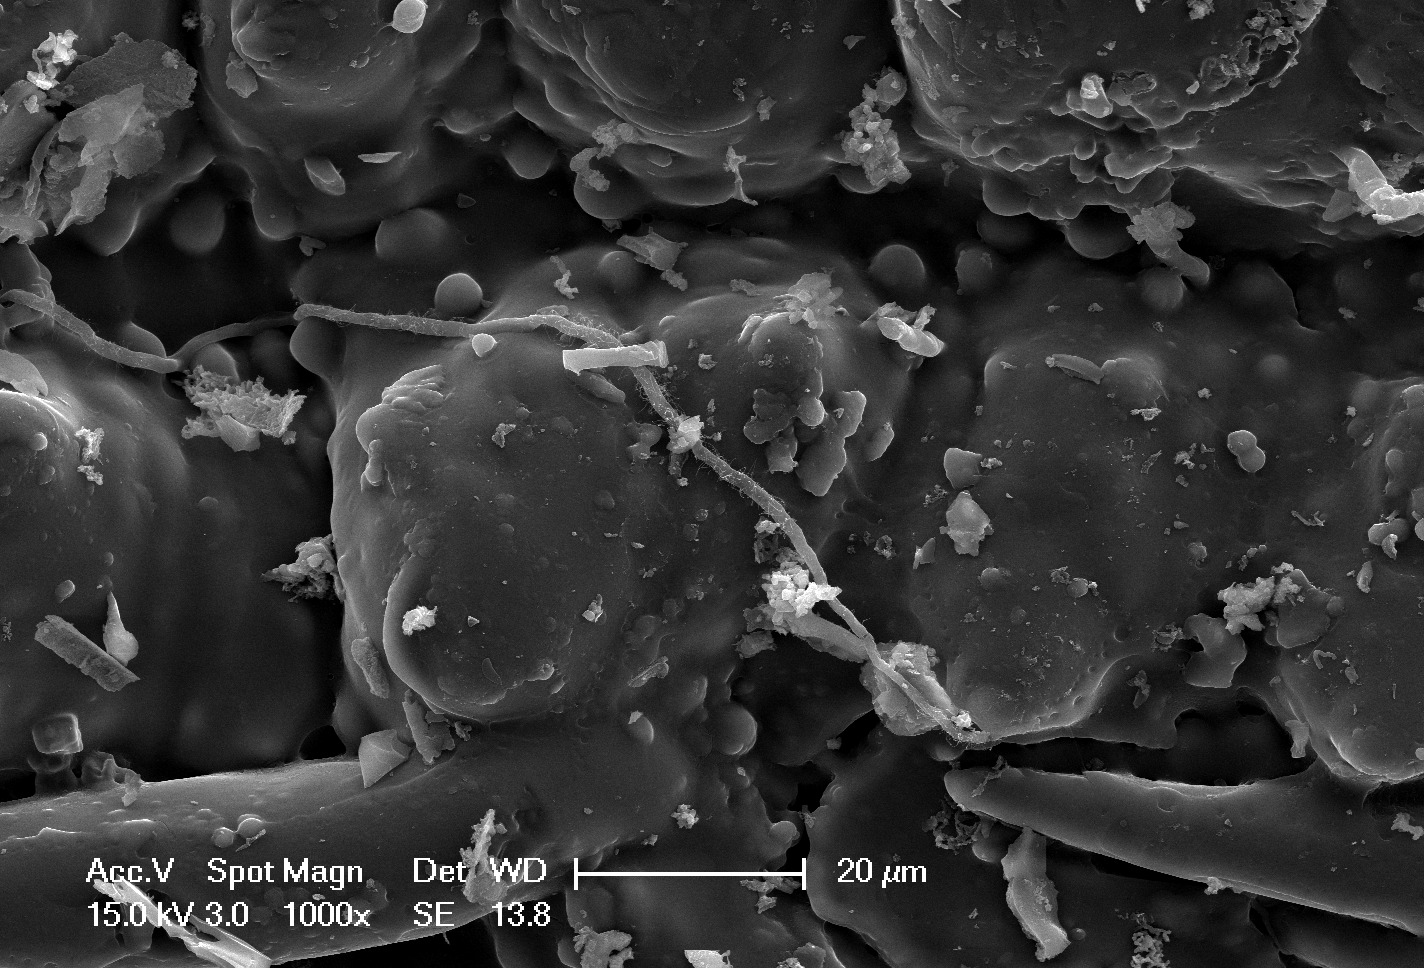


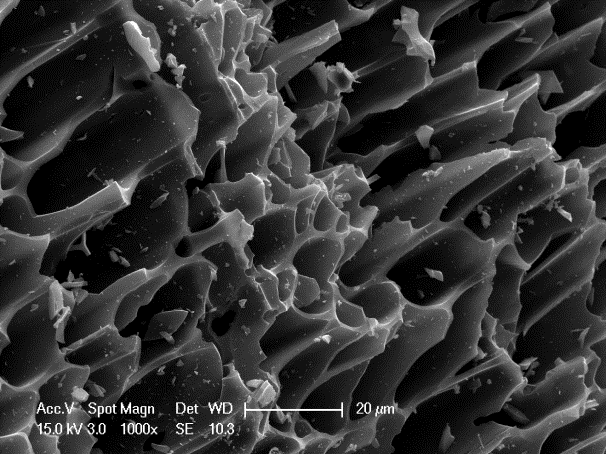


(a)

(b)

(d)

(c)

(e)

(e)

Figure S1. SEM photographs of biochar samples, (a, b) wood BC, (c, d) rice husk BC, and (e, f) bamboo BC. Magnifications are included in the images, all of which were taken from the same sample orientations.

875

796

2161

2349

1058

2532

2588

2535

2348

2362

2160

1587

1550

1560

1069

872

872

790

803

O-H stretching

Ester P-H and O-H ustretching

2161

Aliphatic -N≡C, alkynes’ C=C

Aromatic C=C

C-O, PO43- Si-O-Si stretching

Aromatic C-H,CO32-

-NH2 amines

1428

Si-C6H5

Rice husk BC

Bamboo BC

Wood BC

2922

2922

Aliphatic C-H stretching


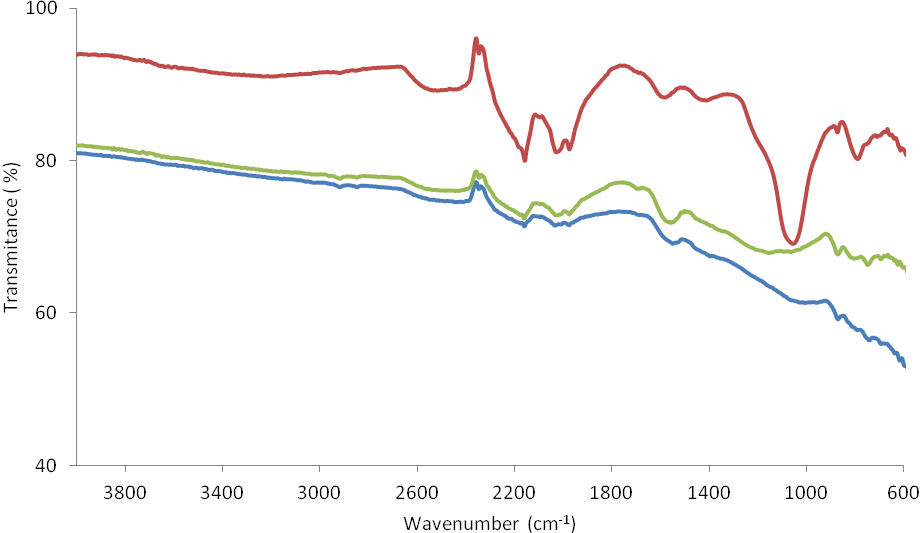


Figure S2. FTIR spectra of the three different biochar in the range 4000 – 400 cm-1.
